# Supplementary material
Source: publisher figshare collection journal article supplement (https://acs.figshare.com/ndownloader/files/3752464)
Supplement: Supplementary file 1 [file 3752464]

Cmpd	SMILES	PleD (% of residual activity)	RocR (% of residual activity)
DCI028	O=C1C(N=CN2[C@@H]3O[C@H](COCC(N=N4)=CN4C[C@@H]5[C@@H](O)[C@@H](O)[C@H](N(C=N6)C7=C6C(NC(N)=N7)=O)O5)[C@@H](O)[C@H]3O)=C2N=C(N)N1	63	88
DCI016	NC1=NC=NC2=C1N=CN2[C@@H]3O[C@H](COCC(N=N4)=CN4C[C@@H]5[C@@H](O)[C@@H](O)[C@H](N(C=N6)C7=C6C(NC(N)=N7)=O)O5)[C@@H](O)[C@H]3O	97	79
DCI021	O=C1C(N=CN2[C@@H]3O[C@H](COCC(N=N4)=CN4C[C@@H]5[C@@H](O)[C@@H](O)[C@H](N(C=N6)C7=C6C(N)=NC=N7)O5)[C@@H](O)[C@H]3O)=C2N=C(N)N1	n.d.	n.d.
DCI015	NC1=NC=NC2=C1N=CN2[C@@H]3O[C@H](COCC(N=N4)=CN4C[C@@H]5[C@@H](O)[C@@H](O)[C@H](N(C=N6)C7=C6C(N)=NC=N7)O5)[C@@H](O)[C@H]3O	105	113
DCI091	O=C1C(N=CN2[C@@H]3O[C@H](COCC4=CN(CCCN(C=N5)C6=C5C(NC(N)=N6)=O)N=N4)[C@@H](O)[C@H]3O)=C2N=C(N)N1	82	163
DCI059	O=C1C(N=CN2CC3=CN(C[C@@H]4[C@@H](O)[C@@H](O)[C@H](N(C=N5)C6=C5C(NC(N)=N6)=O)O4)N=N3)=C2N=C(N)N1	89	77
DCI072	NC1=NC=NC2=C1N=CN2CCCN3C=C(CN4C=NC5=C4N=CN=C5N)N=N3	106	64
DCI135	O=C1C(N=CN2CCN3C=C(CN4C=NC(C(N5)=O)=C4N=C5N)N=N3)=C2N=C(N)N1	104	77
DCI058	ClC1=NC(N)=NC2=C1N=CN2CCCN3C=C(CN4C=NC(C(Cl)=N5)=C4N=C5N)N=N3	32	96
		IC50 = 25.5 mM
DCI061	O=C1C(N=CN2CCCN3C=C(CN4C=NC(C(N5)=O)=C4N=C5N)N=N3)=C2N=C(N)N1	12.5	41
		IC50 = 17.5 mM	IC50 = 66.3 mM
DCI095	ClC1=NC(N)=NC2=C1N=CN2CCCCN3C=C(CN4C=NC(C(Cl)=N5)=C4N=C5N)N=N3	98	128
DCI096	O=C1C(N=CN2CCCCN3C=C(CN4C=NC(C(N5)=O)=C4N=C5N)N=N3)=C2N=C(N)N1	87	92
DCI070	NC1=NC=NC2=C1N=CN2CCCN3C=C(CN4C=NC5=C4N=CN=C5N)N=N3	97	93
DCI133	ClC1=NC(N)=NC2=C1N=CN2CCN3C=C(CN4C=NC(C(Cl)=N5)=C4N=C5N)N=N3	92	86
DCI134	NC1=NC2=C(N=CN2CCCN3C=C(CN4C=NC(C(NC)=N5)=C4N=C5N)N=N3)C(NC)=N1	96	70
DCI136	NC1=NC2=C(N=CN2CCCN3C=C(CN4C=NC(C(NCC5=CC=CC=C5)=N6)=C4N=C6N)N=N3)C(NCC7=CC=CC=C7)=N1	109	75
